# Supplementary material for: Multiplex Autoantibody Detection in Patients with Autoimmune Polyglandular Syndromes
Source: MDPI journal article supplement (doi:10.3390/ijms22115502), 2021-05-23
Supplement: s1 [file s1]

Table S2 Biochip-immobilized autoantigens

| Disease                           | Abbreviation | Protein                                        | #               | C<br>protein,<br>μg in<br>1 ml of<br>gel | Company                          |
|-----------------------------------|--------------|------------------------------------------------|-----------------|------------------------------------------|----------------------------------|
| APS-1                             | IFN-ω        | Interferon<br>omega                            | 300-02J         | 300                                      | PeproTech,<br>USA                |
|                                   | IFN-α-2a     | Interferon-<br>alpha                           | 11100-1         | 300                                      | PBL Assay<br>Science,<br>USA     |
|                                   | IL-22        | Interleukin 22                                 | 200-22          | 300                                      | PeproTech,<br>USA                |
| Addison<br>disease                | 21OH         | Steroid 21<br>hydroxylase                      | ab225641        | 600                                      | Abcam, UK                        |
| Type 1<br>diabetes<br>mellitus    | GAD65        | Glutamic acid<br>decarboxylase                 | 228-<br>20881-2 | 111                                      | RayBiotech,<br>USA               |
|                                   | IA-2         | Tyrosine<br>phosphatase<br>like<br>autoantigen | ab42590         | 60                                       | Abcam, UK                        |
|                                   | ICA1         | Islet cell<br>autoantigen 1                    | ls-g57192       | 100                                      | LifeSpan<br>BioSciences<br>(USA) |
| Autoimmune<br>thyroid<br>diseases | TPO          | Thyroid<br>peroxidase                          | TPO rec         | 300                                      | Bialexa,<br>Russia,              |
|                                   | Tg           | Thyroglobulin                                  | TG naiv         | 300                                      | Bialexa,<br>Russia,              |
